# Supplementary material for: Circulating tumor cells detected only after surgery for non-small cell lung cancer: is it a predictor of recurrence?
Source: PubMed Central journal article supplement — J Thorac Dis. 2020 Sep;12(9):4623–32. doi: 10.21037/jtd-20-1636 (PMC7578482; doi:10.21037/jtd-20-1636), 2020-09
Supplement: jtd-12-09-4623-dss.pdf [file jtd-12-09-4623-dss.pdf]

## Data Sharing Statement

|                     |                                                                                                                                                    |                                                                                                                          |
|---------------------|----------------------------------------------------------------------------------------------------------------------------------------------------|--------------------------------------------------------------------------------------------------------------------------|
| <b>Article Info</b> | <a href="http://dx.doi.org/10.21037/jtd-20-1636">http://dx.doi.org/10.21037/jtd-20-1636</a> .                                                      |                                                                                                                          |
| <b>Item</b>         | <b>Question</b>                                                                                                                                    | <b>Authors' Response<br/>(place "-" if not applicable)</b>                                                               |
| 1                   | Would you like to share data collected for your study to others?                                                                                   | Yes                                                                                                                      |
| 2                   | If not, would you like to share the reason for your decision?                                                                                      | -                                                                                                                        |
| 3                   | What data in particular will be shared?                                                                                                            | Status of circulating tumor cell (CTC) in cases with non-small cell lung cancer, and DFS and OS according to the status. |
| 4                   | Any other documents will be share? Such as study protocol, statistical analysis plan, informed consent form, clinical study report, analytic code. | Statistical analysis plan, informed consent form, and clinical study report will also be shared if requested.            |
| 5                   | When will data availability begin?                                                                                                                 | From the publication date.                                                                                               |
| 6                   | When will data availability end?                                                                                                                   | Two years within the publication date, since the technique or survival date may be updated over time.                    |
| 7                   | To whom will you share the data?                                                                                                                   | Medical oncologists and chest surgeons who are interested in studies of CTC.                                             |
| 8                   | For what type of analysis or purpose?                                                                                                              | For analysis to evaluate the implication of CTC in lung cancer patients.                                                 |
| 9                   | How or where can the data/documents be obtained?                                                                                                   | Emails could be sent to the address below to obtain the shared data: nsawabata@hotmail.com                               |
| 10                  | Any other restrictions?                                                                                                                            | We may balance the potential benefits and risks for each request and then provide the data that could be shared.         |
